# Supplementary material
Source: PubMed Central journal article supplement (PMC3266314)
Supplement: supp_8.1.35_000278_Data_Supplement.pdf [file supp_8.1.35_000278_Data_Supplement.pdf]

APPENDIX 1

**Section II: Attitudes (Part 2)** – For the following questions, consider an “effective” drug – where “effective” means a drug that has shown a clinically significant improvement in survival for the treatment of a metastatic cancer in larger randomized phase III trials and has been recommended for use by a respected provincial evidence-based guideline group.

14. For effective **INTRAVENOUS** drugs that have been *considered but not approved for funding* by your provincial decision making body, describe which of the following you *currently have access to*

|                                                                       | I Have Access            | I Don't Have Access      |
|-----------------------------------------------------------------------|--------------------------|--------------------------|
| Private (out of pocket) payment for drug at my cancer centre          | <input type="checkbox"/> | <input type="checkbox"/> |
| Private insurance payment for drug at my cancer centre                | <input type="checkbox"/> | <input type="checkbox"/> |
| Private (out of pocket) payment for drug at a private infusion clinic | <input type="checkbox"/> | <input type="checkbox"/> |
| Private insurance payment for drug at a private infusion clinic       | <input type="checkbox"/> | <input type="checkbox"/> |
| Clinics in the U.S. where I can refer my patients for treatment       | <input type="checkbox"/> | <input type="checkbox"/> |

Please elaborate on your responses:

---



---



---



---

15. For effective **INTRAVENOUS** drugs that have been *considered but not approved for funding* by your provincial decision making body, check how COMFORTABLE you are with using each of the following.

|                                                                       | Don't Use                | Very Comfortable         | Somewhat Comfortable     | Neither Comfortable or Uncomfortable | Somewhat Uncomfortable   | Very Uncomfortable       |
|-----------------------------------------------------------------------|--------------------------|--------------------------|--------------------------|--------------------------------------|--------------------------|--------------------------|
| Private (out of pocket) payment for drug at my cancer centre          | <input type="checkbox"/> | <input type="checkbox"/> | <input type="checkbox"/> | <input type="checkbox"/>             | <input type="checkbox"/> | <input type="checkbox"/> |
| Private insurance payment for drug at my cancer centre                | <input type="checkbox"/> | <input type="checkbox"/> | <input type="checkbox"/> | <input type="checkbox"/>             | <input type="checkbox"/> | <input type="checkbox"/> |
| Private (out of pocket) payment for drug at a private infusion clinic | <input type="checkbox"/> | <input type="checkbox"/> | <input type="checkbox"/> | <input type="checkbox"/>             | <input type="checkbox"/> | <input type="checkbox"/> |

|                                                                 | Don't Use                | Very Comfortable         | Somewhat Comfortable     | Neither Comfortable or Uncomfortable | Somewhat Uncomfortable   | Very Uncomfortable       |
|-----------------------------------------------------------------|--------------------------|--------------------------|--------------------------|--------------------------------------|--------------------------|--------------------------|
| Private insurance payment for drug at a private infusion clinic | <input type="checkbox"/> | <input type="checkbox"/> | <input type="checkbox"/> | <input type="checkbox"/>             | <input type="checkbox"/> | <input type="checkbox"/> |
| Clinics in the U.S. where I can refer my patients for treatment | <input type="checkbox"/> | <input type="checkbox"/> | <input type="checkbox"/> | <input type="checkbox"/>             | <input type="checkbox"/> | <input type="checkbox"/> |

Please elaborate on your responses:

---



---



---



---

16. For effective **INTRAVENOUS** drugs that have been *considered but not approved for funding* by your provincial decision making body, **describe which SHOULD be available**.

|                                                                       | Should Be Available      | Should NOT Be Available  |
|-----------------------------------------------------------------------|--------------------------|--------------------------|
| Private (out of pocket) payment for drug at my cancer centre          | <input type="checkbox"/> | <input type="checkbox"/> |
| Private insurance payment for drug at my cancer centre                | <input type="checkbox"/> | <input type="checkbox"/> |
| Private (out of pocket) payment for drug at a private infusion clinic | <input type="checkbox"/> | <input type="checkbox"/> |
| Private insurance payment for drug at a private infusion clinic       | <input type="checkbox"/> | <input type="checkbox"/> |

Please elaborate on your response:

---



---



---



---
